# Supplementary material for: Dielectric constant measurements of thin films and liquids using terahertz metamaterials
Source: Royal Society of Chemistry journal article supplement (doi:10.1039/c6ra11777e), 2016-01-01
Supplement: c6ra11777e1.pdf [file c6ra11777e1.pdf]

Supplementary Information for

# Dielectric constant measurements of thin films and liquids using terahertz metamaterials

S. J. Park, S. A. N. Yoon, and Y. H. Ahn\*

Department of Physics and Department of Energy Systems Research, Ajou University,

Suwon 16499, Korea

\* E-mail: [ahnhy@ajou.ac.kr](mailto:ahnhy@ajou.ac.kr)

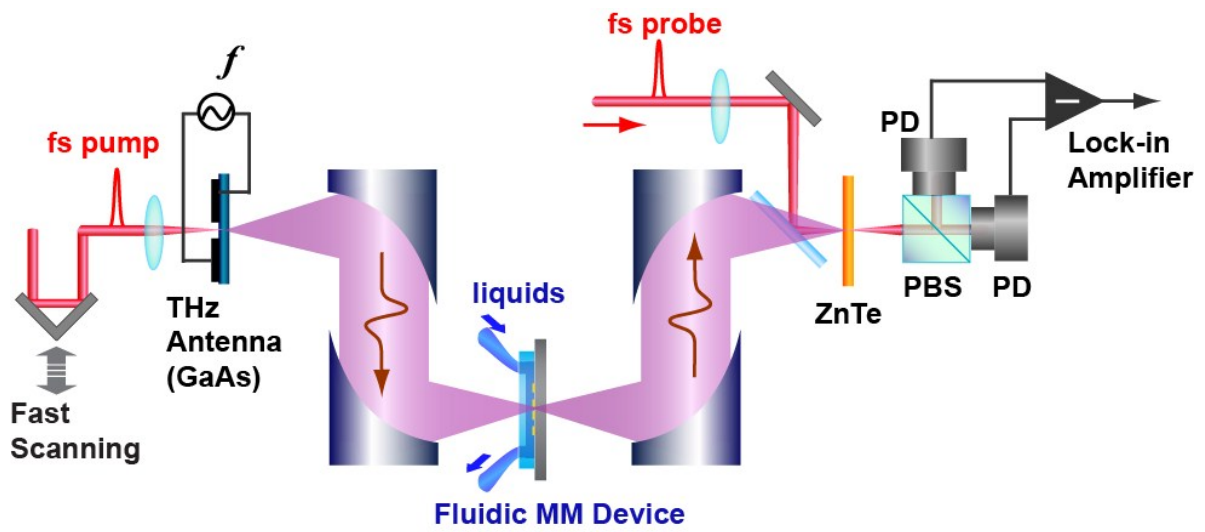

**Supplementary information S1.** Schematic illustration of THz-TDS system. (PD: photodiode, PBS: polarized beam splitter, MM: metamaterials)

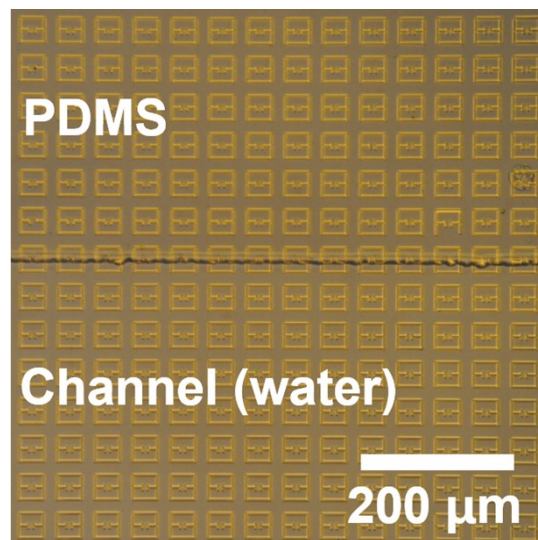

**Supplementary information S2.** Microscopic image of a fluidic metamaterial device with the injection of water

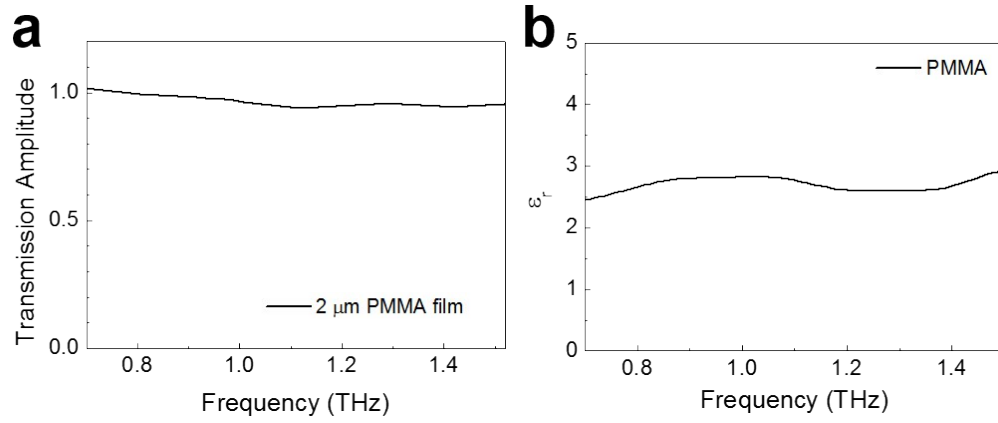

**Supplementary information S3. (a)** THz transmission amplitude of 2-μm-thick PMMA film as a function of frequency **(b)** Dielectric constant of PMMA film extracted from (a).
